# Supplementary material
Source: HighWire-hosted journal article supplement (https://www.g3journal.org/content/suppl/2016/08/24/g3.116.033894)
Supplement: TableS8.pdf [file TableS8.pdf]

**Table S8. Association of PARK2 rs192804963 with human macrophage expression of 28 OXPHOS genes after adjusting for the effect of PARK2 rs75203550**

| Gene                             | Probes       | Chr | Beta* | Se     | Pvalue                |
|----------------------------------|--------------|-----|-------|--------|-----------------------|
| <i>Light-yellow OxPho genes</i>  |              |     |       |        |                       |
| SDHB                             | ILMN_1667257 | 1   | 0.027 | 0.0185 | 0.142                 |
| NDUFB3                           | ILMN_2119945 | 2   | 0.065 | 0.0227 | 4.23 10 <sup>-3</sup> |
| COX17                            | ILMN_2187718 | 3   | 0.049 | 0.0265 | 0.063                 |
| ATP5I                            | ILMN_1772506 | 4   | 0.060 | 0.017  | 4.54 10 <sup>-4</sup> |
| UQCRCQ                           | ILMN_1666471 | 5   | 0.024 | 0.021  | 0.254                 |
| COX7A2                           | ILMN_1701293 | 6   | 0.042 | 0.019  | 0.034                 |
| ATP5J2                           | ILMN_2307883 | 7   | 0.062 | 0.021  | 3.36 10 <sup>-3</sup> |
| NDUFB2                           | ILMN_2117330 | 7   | 0.028 | 0.023  | 0.226                 |
| COX6C                            | ILMN_1654151 | 8   | 0.037 | 0.015  | 0.016                 |
| COX8A                            | ILMN_1809495 | 11  | 0.043 | 0.020  | 0.035                 |
| NDUFA9                           | ILMN_1760741 | 12  | 0.049 | 0.024  | 0.039                 |
| ATP5G2                           | ILMN_1660577 | 12  | 0.010 | 0.025  | 0.689                 |
| COX6A1                           | ILMN_1783636 | 12  | 0.048 | 0.022  | 0.029                 |
| NDUFA11                          | ILMN_2175712 | 19  | 0.014 | 0.022  | 0.524                 |
| NDUFB7                           | ILMN_1813604 | 19  | 0.026 | 0.219  | 0.222                 |
| COX6B1                           | ILMN_2154671 | 19  | 0.022 | 0.018  | 0.226                 |
| ATP5J                            | ILMN_2348093 | 21  | 0.009 | 0.021  | 0.655                 |
| NDUFA1                           | ILMN_1784286 | X   | 0.021 | 0.019  | 0.269                 |
| <i>Midnight-blue OxPho genes</i> |              |     |       |        |                       |
| ATP5F1                           | ILMN_1721989 | 1   | 0.014 | 0.018  | 0.425                 |
| PPA2                             | ILMN_1687785 | 4   | 0.032 | 0.028  | 0.251                 |
| NDUFC1                           | ILMN_1733603 | 4   | 0.030 | 0.024  | 0.219                 |
| NDUFA4                           | ILMN_1751258 | 7   | 0.032 | 0.023  | 0.161                 |
| ATP5C1                           | ILMN_1701269 | 10  | 0.037 | 0.025  | 0.143                 |
| SDHD                             | ILMN_1698487 | 11  | 0.041 | 0.027  | 0.134                 |
| ATP5L                            | ILMN_2079285 | 11  | 0.038 | 0.031  | 0.215                 |
| NDUFAB1                          | ILMN_2179018 | 16  | 0.057 | 0.026  | 0.030                 |
| ATP5H                            | ILMN_1666372 | 17  | 0.025 | 0.019  | 0.191                 |
| NDUFV2                           | ILMN_2086417 | 18  | 0.034 | 0.024  | 0.162                 |

\* Effect of the minor rs192804963-A allele on gene expression. Its allele frequency was 0.21 and its r<sup>2</sup> imputation quality 0.66.
